# Supplementary material for: Population-specific causal disease effect sizes in functionally important regions impacted by selection
Source: PubMed Central journal article supplement (PMC7889654; doi:10.1038/s41467-021-21286-1), 2021-02-17
Supplement: 41467_2021_21286_MOESM4_ESM.pdf [file 41467_2021_21286_MOESM4_ESM.pdf]

## Description of Additional Supplementary Files

### Supplementary Data 1

**List of baseline-LD-X model annotations.** **a)** Summary information for functional annotations. **b)** Summary information for continuous-valued annotations. **c)** Correlation between functional and continuous-valued annotations. **d)** Correlation between continuous-valued annotations.

### Supplementary Data 2

**List of the specifically expressed gene (SEG) annotations.** **a)** Mean background selection statistic of SEG annotations. **b)** Correlation between SEG annotation and continuous-valued annotations.

### Supplementary Data 3

**Numerical results of S-LDXR in null simulations with 1% causal SNPs.** The shrinkage parameter,  $\alpha$ , is set to 0.0 in **a**, 0.25 in **b**, 0.5 in **c**, 0.75 in **d**, and 1.0 in **e**. Positive rate is defined as the proportion of tests with p-value less than 0.05. Standard error of the positive rate is obtained using jackknife.

### Supplementary Data 4

**Numerical results of S-LDXR in null simulations with 10% causal SNPs.** The shrinkage parameter,  $\alpha$ , is set to 0.0 in **a**, 0.25 in **b**, 0.5 in **c**, 0.75 in **d**, and 1.0 in **e**. Positive rate is defined as the proportion of tests with p-value less than 0.05. Standard error of the positive rate is obtained using jackknife.

### Supplementary Data 5

**Numerical results of S-LDXR in null simulations with 100% causal SNPs.** The shrinkage parameter,  $\alpha$ , is set to 0.0 in **a**, 0.25 in **b**, 0.5 in **c**, 0.75 in **d**, and 1.0 in **e**. Positive rate is defined as the proportion of tests with p-value less than 0.05. Standard error of the positive rate is obtained using jackknife.

### Supplementary Data 6

**Numerical results of S-LDXR in causal simulations with 1% causal SNPs.** The shrinkage parameter,  $\alpha$ , is set to 0.0 in **a**, 0.25 in **b**, 0.5 in **c**, 0.75 in **d**, and 1.0 in **e**. Positive rate is defined as the proportion of tests with p-value less than 0.05. Standard error of the positive rate is obtained using jackknife.

### Supplementary Data 7

**Numerical results of S-LDXR in causal simulations with 10% causal SNPs.** The shrinkage parameter,  $\alpha$ , is set to 0.0 in **a**, 0.25 in **b**, 0.5 in **c**, 0.75 in **d**, and 1.0 in **e**. Positive rate is defined as the proportion of tests with p-value less than 0.05. Standard error of the positive rate is obtained using jackknife.

### Supplementary Data 8

**Numerical results of S-LDXR in causal simulations with 100% causal SNPs.** The shrinkage parameter,  $\alpha$ , is set to 0.0 in **a**, 0.25 in **b**, 0.5 in **c**, 0.75 in **d**, and 1.0 in **e**. Positive rate is defined as the proportion of tests with p-value less than 0.05. Standard error of the positive rate is obtained using jackknife.

### Supplementary Data 9

**Numerical results of S-LDXR in null simulations with annotation-dependent MAF-dependent genetic architectures.** 10% of SNPs were randomly selected to be causal. The shrinkage parameter,  $\alpha$ , is set to 0.0 in **a**, 0.25 in **b**, 0.5 in **c**, 0.75 in **d**, and 1.0 in **e**. Positive rate is defined as the proportion of tests with p-value less than 0.05. Standard error of the positive rate is obtained using jackknife.

#### **Supplementary Data 10**

**Numerical results of S-LDXR in null simulations with annotation-dependent MAF-dependent genetic architectures and 5 MAF bins added to the baseline-LD-X model.** 10% of SNPs were randomly selected to be causal. The shrinkage parameter,  $\alpha$ , is set to 0.0 in **a**, 0.25 in **b**, 0.5 in **c**, 0.75 in **d**, and 1.0 in **e**. Positive rate is defined as the proportion of tests with p-value less than 0.05. Standard error of the positive rate is obtained using jackknife.

#### **Supplementary Data 11**

**Numerical results of S-LDXR in null simulations where causal variants differ across the two populations.** Here, 10% of SNPs were randomly selected to be causal in each population, with 80% of the causal variants in each population shared with the other population. The shrinkage parameter,  $\alpha$ , is set to 0.0 in **a**, 0.25 in **b**, 0.5 in **c**, 0.75 in **d**, and 1.0 in **e**. Positive rate is defined as the proportion of tests with p-value less than 0.05. Standard error of the positive rate is obtained using jackknife.

#### **Supplementary Data 12**

**Numerical results of S-LDXR in null simulations using all simulated GWAS samples and half (250) the default reference sample size.** Here, 10% of SNPs were randomly selected to be causal. Shrinkage level,  $\alpha$ , was set to 0.5. **a)** Estimates of  $\lambda^2(C)$  for binary annotations and quintiles of continuously valued annotation in simulations under the baseline-LD-X model. **b)** Estimates of  $\lambda^2(C)$  for binary annotations and quintiles of continuously valued annotation in simulations under the model involving annotation-dependent and MAF-dependent genetic architectures. Mean and standard errors were obtained across 1,000 simulations.

#### **Supplementary Data 13**

**Numerical results of S-LDXR in null simulations using all simulated GWAS samples and twice (1,000) the default reference sample size.** Here, 10% of SNPs were randomly selected to be causal. Shrinkage level,  $\alpha$ , was set to 0.5. **a)** Estimates of  $\lambda^2(C)$  for binary annotations and quintiles of continuously valued annotation in simulations under the baseline-LD-X model. **b)** Estimates of  $\lambda^2(C)$  for binary annotations and quintiles of continuously valued annotation in simulations under the model involving annotation-dependent and MAF-dependent genetic architectures. Mean and standard errors were obtained across 1,000 simulations.

#### **Supplementary Data 14**

**Numerical results of S-LDXR in null simulations using half of the simulated GWAS samples and default (500) reference sample size.** Here, 10% of SNPs were randomly selected to be causal. Shrinkage level,  $\alpha$ , was set to 0.5. **a)** Estimates of  $\lambda^2(C)$  for binary annotations and quintiles of continuously valued annotation in simulations under the baseline-LD-X model. **b)** Estimates of  $\lambda^2(C)$  for binary annotations and quintiles of continuously valued annotation in simulations under the model involving annotation-

dependent and MAF-dependent genetic architectures. Mean and standard errors were obtained across 1,000 simulations.

#### **Supplementary Data 15**

**Numerical S-LDXR results for quintiles of 8 continuous-valued annotations across 31 diseases and complex traits.** The shrinkage parameter,  $\alpha$ , was set to 0.0 in **a**, 0.5 in **b**, and 1.0 in **c**. **d)** Here, results were meta-analyzed across a subset of 20 approximately independent traits with default shrinkage parameter ( $\alpha=0.5$ ).

#### **Supplementary Data 16**

**Numerical S-LDXR results for quintiles of 20 binary functional annotations across 31 diseases and complex traits.** The shrinkage parameter,  $\alpha$ , was set to 0.0 in **a**, 0.5 in **b**, and 1.0 in **c**. **d)** Here, results were meta-analyzed across a subset of 20 approximately independent traits with default shrinkage parameter ( $\alpha=0.5$ ).

#### **Supplementary Data 17**

**Numerical S-LDXR results of observed  $\lambda^2(C)$  vs. expected  $\lambda^2(C)$  based on 8 continuous-valued annotations for 20 binary annotations across 31 diseases and complex traits.** The shrinkage parameter,  $\alpha$ , was set to 0.0 in **a**, 0.5 in **b**, and 1.0 in **c**.

#### **Supplementary Data 18**

**Numerical S-LDXR results for 53 specifically expressed gene (SEG) annotations across 31 diseases and complex traits.** While heritability enrichment may be impacted by choice of diseases and traits,  $\lambda^2(C)$  is not expected to be disease specific. The shrinkage parameter,  $\alpha$ , was set to 0.0 in **a**, 0.5 in **b**, and 1.0 in **c**.

#### **Supplementary Data 19**

**Numerical S-LDXR results for 53 specifically expressed gene (SEG) annotations for 14 blood-related traits vs. 17 other traits.** The list of 14 blood phenotypes is: BASO, EO, HBA1C, HGB, HTC, LYMPH, MCH, MCHC, MCV, MONO, NEUT, PLT, RBC, WBC. The list of 17 non-blood phenotype is: AF, AMN, AMP, BMI, BS, DBP, EGFR, HEIGHT, HDL, LDL, MDD, RA, SBP, SCZ, TC, TG, T2D. Full name of the abbreviations can be found in Table S2. Here, the shrinkage parameter  $\alpha$  was set to the default of 0.5.

#### **Supplementary Data 20**

**Numerical S-LDXR results of observed  $\lambda^2(C)$  vs. expected  $\lambda^2(C)$  based on 8 continuous-valued annotations for 53 specifically expressed gene (SEG) annotations across 31 diseases and complex traits.** While heritability enrichment may be impacted by choice of diseases and traits,  $\lambda^2(C)$  is not expected to be disease specific. The shrinkage parameter,  $\alpha$ , was set to 0.0 in **a**, 0.5 in **b**, and 1.0 in **c**.

#### **Supplementary Data 21**

**Numerical S-LDXR results of  $\lambda^2(C)$  for 53 specifically expressed gene (SEG) annotations for each of the 31 diseases and complex traits.** The shrinkage parameter,  $\alpha$ , was set to the default value of 0.5.
